# Supplementary material for: On the way to greener ionic liquids: identification of a fully mineralizable phenylalanine-based ionic liquid
Source: Royal Society of Chemistry journal article supplement (doi:10.1039/c6gc00417b), 2016-01-01
Supplement: c6gc00417b1.pdf [file c6gc00417b1.pdf]

## **ESI**

### **On the way to greener ionic liquids**

#### **Identification of a fully mineralizable phenylalanine-based ionic liquid**

Annette Haiß, Andrew Jordan, Janin Westphal, Evgenia Logunova, Nicholas  
Gathergood, Klaus Kümmerer

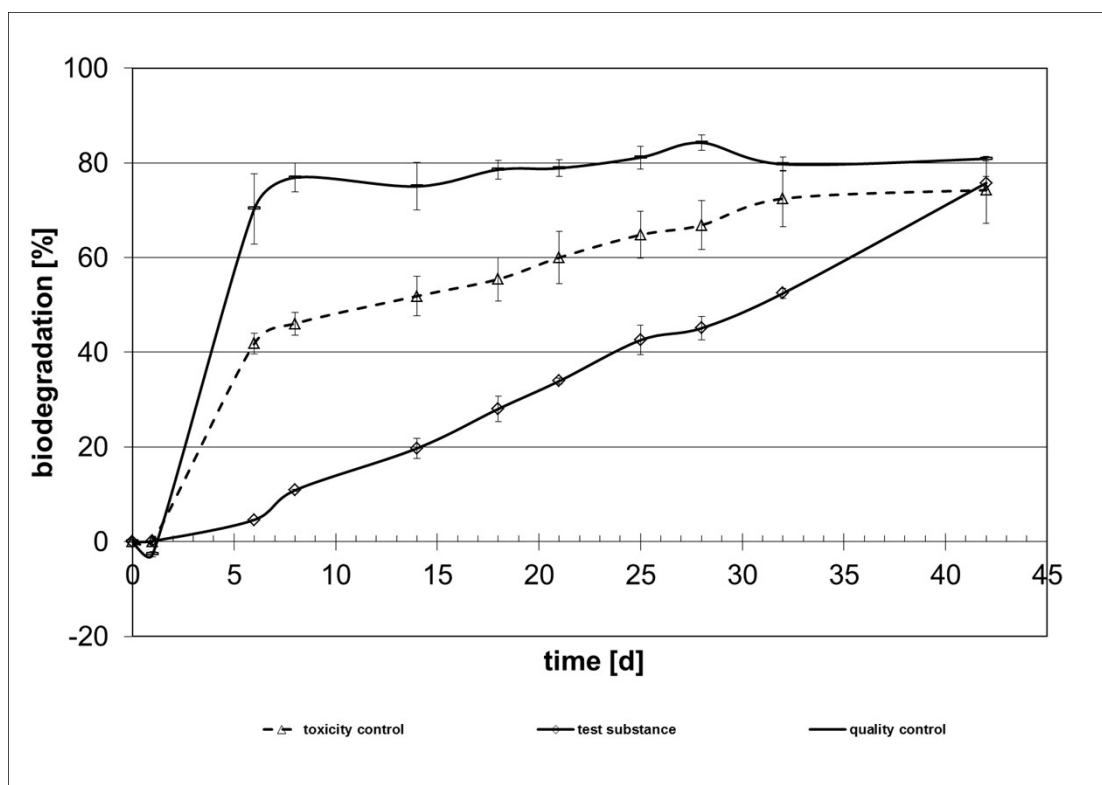

**Fig. S1** Course of biodegradation of fully mineralizable but not readily biodegradable IL (4) in comparison to readily biodegradable sodium acetate. The toxicity control shows no inhibitory or toxic effect of IL (4) against the microorganisms as more than 25% biodegradation occurred till day 14. Biodegradation values are the average values of duplicates.
